# Supplementary material for: Self-assembled mononuclear complexes: open metal sites and inverse dimension-dependent catalytic activity for the Knoevenagel condensation and CO2 cycloaddition
Source: Royal Society of Chemistry journal article supplement (doi:10.1039/d2nr04103k), 2022-01-01
Supplement: d2nr04103k1.pdf [file d2nr04103k1.pdf]

## Electronic Supplementary Information

### **Self-assembled mononuclear complexes: open metal sites and inverse dimension-dependent catalytic activity for Knoevenagel condensation and CO<sub>2</sub> cycloaddition**

Heng Xu,<sup>1</sup> Lexi Zhang,<sup>\*1</sup> Yue Xing,<sup>1</sup> Yanyan Yin,<sup>\*2</sup> Bo Tang<sup>1</sup> and Lijian Bie<sup>\*1</sup>

<sup>1</sup> School of Materials Science and Engineering, Tianjin Key Lab for Photoelectric Materials and Devices, Key Laboratory of Display Materials and Photoelectric Devices (Ministry of Education), National Demonstration Center for Experimental Function Materials Education, Tianjin University of Technology, Tianjin 300384, China

<sup>2</sup> Department of Environmental Science and Engineering, Nankai University Binhai College, Tianjin 300270, China

\* Corresponding authors:

**Le-Xi Zhang**, Tel./Fax: +86 022 60214028. E-Mail: lxzhang@tjut.edu.cn

**Yan-Yan Yin**, Tel./Fax: +86 022 63304761. E-Mail: yinyanyanyyyy@163.com

**Li-Jian Bie**, Tel./Fax: +86 022 60215508. E-Mail: ljbie@tjut.edu.cn

## Contents

|                                                                    |    |
|--------------------------------------------------------------------|----|
| S.1 Experimental section .....                                     | 3  |
| S1.1. Materials .....                                              | 3  |
| S1.2. Analytical methods .....                                     | 3  |
| S1.3. Synthesis and structural characterization of catalysts ..... | 4  |
| S1.4. Thermal stability .....                                      | 6  |
| S1.5. DFT calculation .....                                        | 6  |
| S2. Catalysis Experiments .....                                    | 8  |
| S2.1. Knoevenagel condensation reaction.....                       | 8  |
| S2.1.1. Typical procedure.....                                     | 8  |
| S2.1.2. Ultrasonic procedure .....                                 | 8  |
| S2.2. CO <sub>2</sub> -epoxide cycloaddition reaction .....        | 8  |
| S3. Fig. S1-S9 and Tab. S1-S.9 .....                               | 10 |

## **S1. Experimental section**

### **S1.1. Materials**

All the solvents and reagents were purchased from commercial sources and used without further purification.

### **S1.2. Analytical methods**

The single-crystal X-ray diffraction (SXRD) data were collected at room temperature (RT) on a XtaLAB PRO diffractometer with graphite-monochromated Cu K $\alpha$  radiation ( $\lambda = 1.5406 \text{ \AA}$ ) (Rigaku, Japan). Diffraction intensities were collected with a CCD area detector image plate diffractometer by using the  $\omega/\phi$  scan technique. Absorption corrections were applied by using multiscan techniques. The structures were solved by direct methods with SHELXS and refined by least-squares procedures on  $F_o^2$  using SHELXL by minimizing the function  $\sum_w(F_o^2 - F_c^2)^2$  in the Olex2 package, where  $F_o$  and  $F_c$  are the observed and calculated structure factors, respectively. All non-hydrogen atoms were located geometrically and refined with anisotropic temperature parameters; hydrogen atoms were refined as rigid groups. The powder X-ray diffraction (PXRD) patterns were collected from  $8^\circ$  to  $55^\circ$ , with a step of  $0.02^\circ$  and data collection time of 0.2 s, on a Rigaku D/max-2500 advance diffractometer (Rigaku, Japan) with Cu-K $\alpha$ 1 radiation ( $\lambda = 1.54056 \text{ \AA}$ ). Elemental analyses (C, H, and N) were carried on a Vario EL Cube elemental analyzer (Elementar, German). Pictures and videos of the microscope were obtained from Modle BX53MTRF-S (Olympus, Japan) and DFM-40C (Caikon, China), respectively. Thermogravimetric analysis (TGA) was obtained

with a mass of around 5.0 mg, in the temperature range from RT to 700 °C using TA Instruments TG/DTA 6300 in N<sub>2</sub> with a heating rate of 10 °C min<sup>-1</sup>. The specific surface areas were measured via the Brunauer-Emmett-Teller (BET) method using N<sub>2</sub> adsorption at 77 K after treating the samples at 60 °C and 10<sup>-4</sup> Pa for 2 h using BELSORP-max (MicrotracBEL, Japan). The Fourier Transform infrared (FT-IR) spectra were recorded on a Nicolet iS10 spectrometer with KBr pellets in the range of 4000–700 cm<sup>-1</sup> (Thermo Fisher Scientific, USA). All catalytic experiments were performed using a WP-TEC-1020HSL reactor from Xi'an WATTCAS Chemical Technology Co. Ltd, China. The compounds were performed on Agilent 7890B/5977B by injection in a gas chromatograph coupled with a mass spectrometer (GC-MS) using a silica column of HP-5 (30 × 0.25 × 0.25).

### **S1.3. Synthesis and structural characterization of catalysts**

Preparation of [Cu(TMA)(2,2'-bpy)H<sub>2</sub>O]·2H<sub>2</sub>O (**1**): 1 mmol Cu(OAc)<sub>2</sub>·H<sub>2</sub>O, 1 mmol TMA, and 1 mmol bpy were completely dissolved in 30 mL deionized water and 30 mL ethanol under magnetic stirring for 15 min. The mixture was filtered and the clear solution was kept stand still without any disturbance at r.t. Sapphire transparent plate-shaped crystals were finally obtained through slow evaporation of the filtered solution in air for 12 h. The experimental procedure can be repeated easily with an average yield of ca. 52% based on Cu<sup>2+</sup>. Elemental analysis (%) calculated for (C<sub>17</sub>H<sub>18</sub>CuN<sub>2</sub>O<sub>5</sub>S) (**1**): C, 47.94; H, 4.26; N, 6.58. Found (**1**): C, 47.93; H, 4.27; N, 6.56. FT-IR (KBr, cm<sup>-1</sup>): 3416 (vs), 3113 (m), 2944 (w), 1640 (vs), 1597 (vs), 1495 (w), 1447 (s), 1408 (vs),

1313 (m), 1252 (w), 1156 (w), 976 (w), 964 (w), 818 (m), 772 (s), 732 (m).

Preparation of  $[\text{Cu}(\text{TMA})(\text{phen})\text{H}_2\text{O}] \cdot 2\text{H}_2\text{O}$  (**2**): 1 mmol  $\text{Cu}(\text{OAc})_2 \cdot \text{H}_2\text{O}$ , 1 mmol TMA, and 1 mmol phen were completely dissolved in 30 mL deionized water and 30 mL ethanol under magnetic stirring for 20 min. The resulting grey blue product was filtered off. Grey blue transparent lump crystals were finally obtained through slow evaporation of the filtered solution in air for 2 days. The experimental procedure can be repeated easily with an average yield of ca. 48% based on  $\text{Cu}^{2+}$ . Elemental analysis (%) calculated for  $(\text{C}_{19}\text{H}_{18}\text{CuN}_2\text{O}_7\text{S})$  (**1**): C, 47.35; H, 3.76; N, 5.81. Found (**1**): C, 47.33; H, 3.78; N, 5.79. FT-IR (KBr,  $\text{cm}^{-1}$ ): 3440 (vs), 3119 (m), 2944 (w), 1632 (vs), 1582 (vs), 1519 (w), 1428 (m), 1404 (vs), 1343 (w), 1223 (w), 1197 (w), 976 (w), 962 (w), 874 (w), 852 (m), 747 (m), 724 (s).

Preparation of  $[\text{Cu}(\text{TMA})(3\text{-CNPy})]$  (**3**): 1 mmol  $\text{Cu}(\text{OAc})_2 \cdot \text{H}_2\text{O}$ , 1 mmol TMA, and 1 mmol 3-CNPy were completely dissolved in 30 mL deionized water and 30 mL ethanol under magnetic stirring for 10 min. The generated precipitate was separated by filtration. Azure transparent needle-like crystals were finally obtained through slow evaporation of the filtered solution in air for 3 days. The experimental procedure can be repeated easily with an average yield of ca. 61% based on  $\text{Cu}^{2+}$ . Elemental analysis (%) calculated for  $(\text{C}_{13}\text{H}_8\text{CuN}_2\text{O}_4\text{S})$  (**1**): C, 44.38; H, 2.29; N, 7.96. Found (**1**): C, 44.39; H, 2.31; N, 7.95. FT-IR (KBr,  $\text{cm}^{-1}$ ): 3440 (vs), 3103 (w), 2920 (w), 2235 (w), 1680 (vs), 1595 (vs), 1564 (vs), 1474 (w), 1419(m), 1335 (s), 1242 (w), 1181 (w), 964 (w), 923 (w), 835 (w), 757 (s).

Preparation of  $[\text{Zn}(\text{TMA})(2,2'\text{-bpy})\text{H}_2\text{O}]\cdot 2\text{H}_2\text{O}$  (**4**): 1 mmol  $\text{Zn}(\text{OAc})_2\cdot 2\text{H}_2\text{O}$ , 1 mmol TMA, and 1 mmol bpy were completely dissolved in 20 mL deionized water and 30 mL ethanol under magnetic stirring for 15 min. The mixture was filtered and the clear solution was kept stand still without any disturbance at r.t. Transparent schistose crystals were finally obtained through slow evaporation of the filtered solution in air for 3 days. The experimental procedure can be repeated easily with an average yield of ca. 47% based on  $\text{Zn}^{2+}$ . Elemental analysis (%) calculated for  $(\text{C}_{17}\text{H}_{18}\text{ZnN}_2\text{O}_5\text{S})$  (**1**): C, 42.73; H, 4.22; N, 5.86. Found (**1**): C, 42.74; H, 4.24; N, 5.85. FT-IR (KBr,  $\text{cm}^{-1}$ ): 3424 (vs), 3078 (m), 2924 (w), 1602 (vs), 1598 (vs), 1492 (w), 1444 (s), 1418 (m), 1337 (m), 1317 (m), 1156 (w), 1027 (w), 967 (w), 819 (w), 769 (vs), 736 (m).

#### **S1.4. Thermal stability**

The thermal stability of the synthesized samples was assessed by thermogravimetric analysis (TGA) by heating the complexes **1-4** from RT to 700 °C under a  $\text{N}_2$  atmosphere.

#### **S1.5 DFT calculation**

The DFT calculation was performed by using the Dmol<sup>3</sup> code.<sup>1</sup> The exchange and correlation energies were determined with the Perdew, Burke, and Ernzerhof (PBE) functional within the generalized gradient approximation (GGA).<sup>2</sup> The DFT semi-core pseudo potentials (DSPPs) core treatment is implemented for relativistic effects, which replaces core electrons by a single effective potential and introduces some degree of relativistic correction into the core.<sup>3</sup> Moreover, the double numerical plus polarization (DNP) is chosen as the basis set. A thermal smearing of 0.005 Ha (1 Ha = 27.21 eV) to

the orbital occupation is applied to speed up electronic convergence. The convergence tolerance of energy, maximum force, and maximum displacement for geometry optimization are  $1 \times 10^{-5}$  Ha, 0.002 Ha/Å, and 0.005 Å, respectively. The transition states (TS) for HCOOH decomposition are obtained by LST/QST tools in Dmol<sup>3</sup> code. The root-mean-square (RMS) convergence for TS search is set to be 0.002 Ha/Å. Stretching frequencies are analyzed to characterize the transition states, for which only one imaginary frequency of each of them was found.<sup>4</sup>

## **S2. Catalysis Experiments**

### **S2.1. Knoevenagel condensation reaction**

#### **S2.1.1. Typical procedure**

A schlenk reaction tube was charged with benzaldehyde (1.0 mmol), malononitrile (1.3 mmol) and catalyst (0.5 mol%). The mixture was stirred at r.t for 1 h. When the reaction was completed, the catalyst was recovered by centrifugation. Then the catalyst was filtered off, washed with ethanol and water, dried, and reused without further purification and regeneration. Moreover, the recovered catalysts were characterized by powder X-ray diffraction (PXRD) and showed identical results to those of the fresh samples. Gas chromatograph coupled with a mass spectrometer (GC-MS) was used to detect the catalytic effect of the reaction qualitatively and quantitatively.

#### **S2.1.2. Ultrasonic procedure**

To a 1.5 mL centrifuge tube, benzaldehyde (1.0 mmol), malononitrile (1.3 mmol) and catalyst (2 mol%) were added under ambient conditions. The tube was immersed in the ultrasonic bath in an open atmosphere for up to 30 min. Then, an appropriate amount of acetonitrile was added to remove the catalyst by centrifugation. The liquid was transferred to a 25 mL volumetric flask and mixed with acetonitrile. The mixture was stirred, then a sample (1.5 mL) was removed from the organic phase and analyzed by GC-MS.

### **S2.2. CO<sub>2</sub>-epoxide cycloaddition reaction**

All the cycloaddition reactions were conducted in a 20 mL schlenk reaction tube



charged with the requisite amount of catalyst, epoxide, and cocatalyst under magnetic stirring at 800 rpm. The reactions were conducted under 1 atm CO<sub>2</sub> pressures at different temperatures. The yields were then determined using a GC-MS.

S3. Fig. S1-S9 and Tab.S1-S9

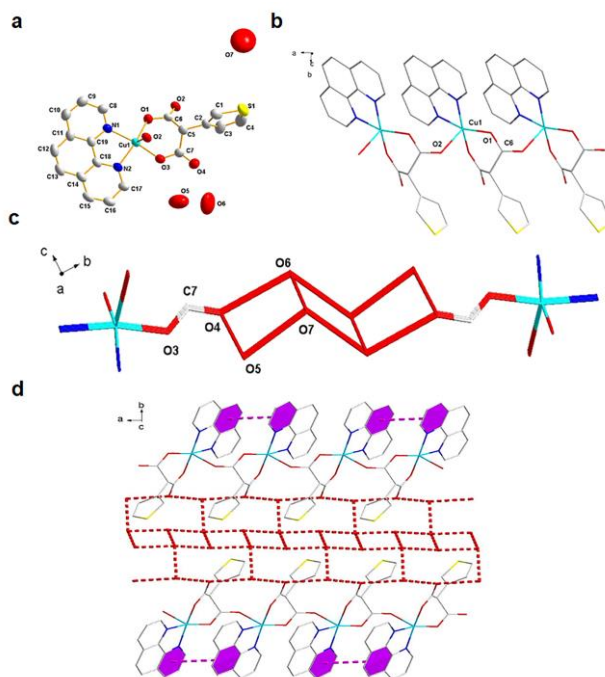

**Fig. S1.** a) Coordination environments of  $\text{Cu}^{2+}$  site in **2**; b)  $\text{Cu}^{2+}$  site connected by  $\text{TMA}^{2-}$  anions; c) The adjacent  $\text{Cu}^{2+}$  sites are linked together along  $bc$  plane by indirect hydrogen interactions; d) On the  $ab$  plane, 2D supramolecular layer links with another equivalent layer through indirect hydrogen bonds and  $\pi \cdots \pi$  interactions to form 2D supramolecular bilayer.

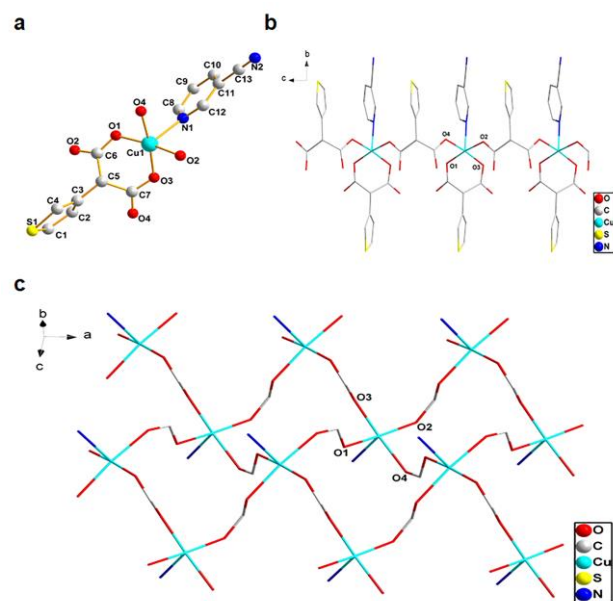

**Fig. S2.** a) View of the coordination environment of the  $\text{Cu}^{2+}$  cation in **3**; b)  $\text{Cu}^{2+}$  sites connected by  $\text{TMA}^{2-}$  anions; c) 2D structure of **3** stabilized by carboxylate radical (O1, O2, O3 and O4).

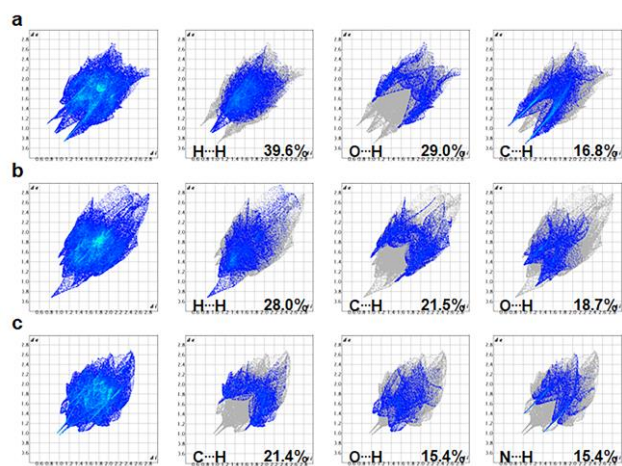

**Fig. S3.** All and decomposed FP plots (a-c), presenting percentage contribution of the following intermolecular contacts to the total Hirshfeld surface area: total, H···H, O···H, C···H or N···H of **1**, **2** and **3** crystal structures.

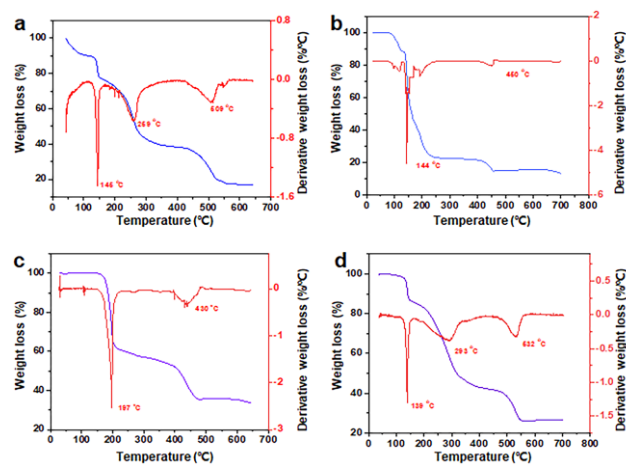

**Fig. S4.** TGA plots of complexes a) 1, b) 2 c) 3, and d) 4, respectively.

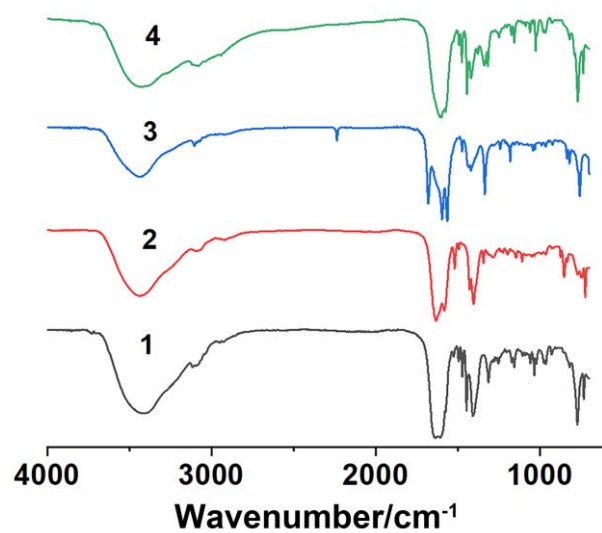

**Fig. S5.** FT-IR spectra of complexes 1-4, respectively.

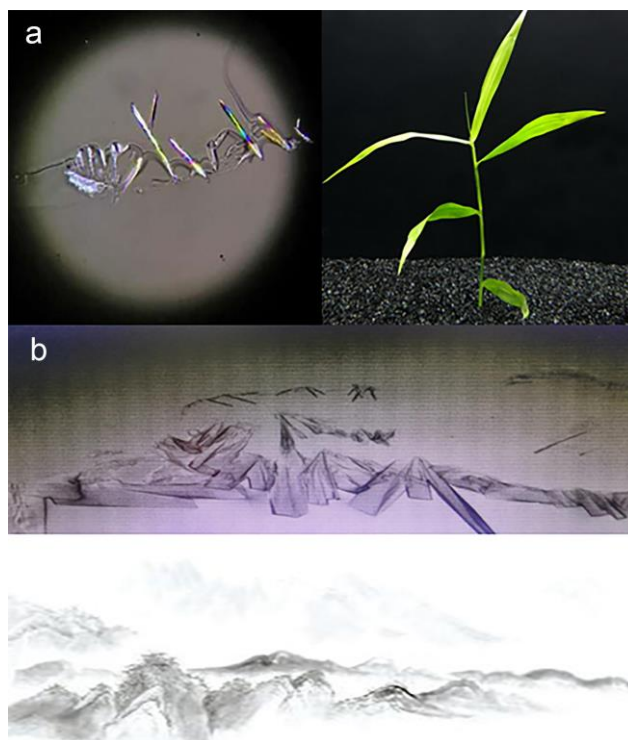

**Fig. S6.** The photos of complex **1** crystallized for a) 5 min and b) 30 min, respectively.

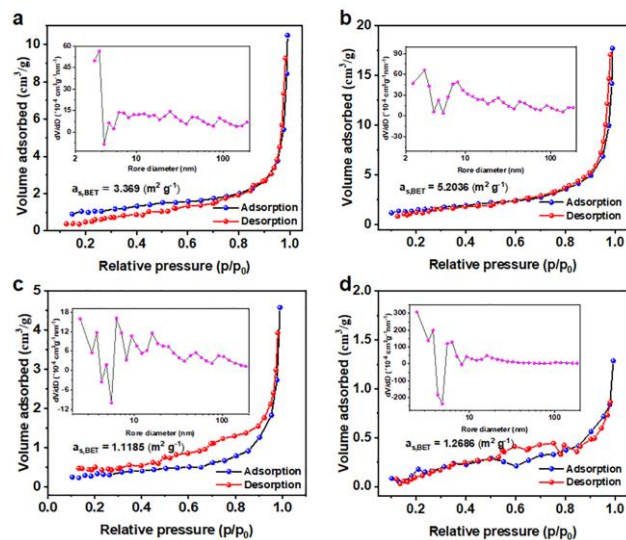

**Fig. S7.**  $N_2$  adsorption of complexes a) 1, b) 2, c) 3, and d) 4, respectively.



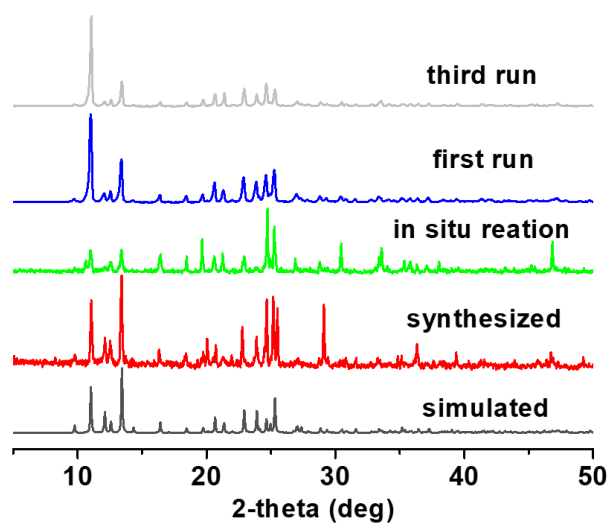

**Fig. S8.** The PXRD patterns of complex 4. Black: XRD simulated with cif. Red: XRD obtained by culturing out the crystals. Green: XRD of solids produced during in situ catalytic reactions. Blue: XRD of catalyst after one cycle reaction. Grey: XRD of catalyst after five cycles of reaction.

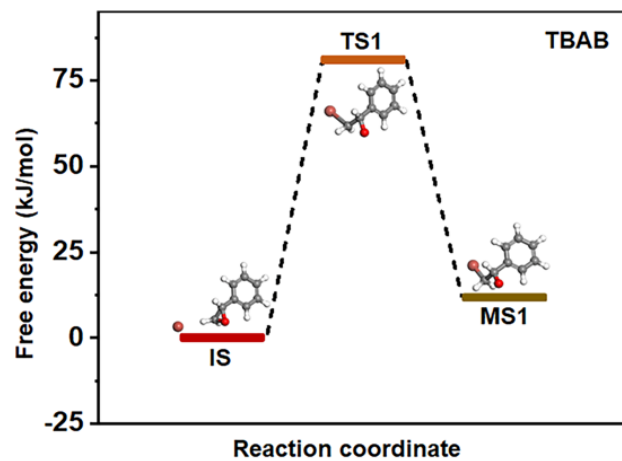

**Fig. S9.** Free energy profiles for the TBAB catalyzed ring opening.

**Tab. S1.** X-ray crystallographic data and structural refinement for **1-4**.

| Complex                        | <b>1</b>                                                            | <b>2</b>                                                          | <b>3</b>                                                         | <b>4</b>                                                           |
|--------------------------------|---------------------------------------------------------------------|-------------------------------------------------------------------|------------------------------------------------------------------|--------------------------------------------------------------------|
| Formula                        | C <sub>17</sub> H <sub>18</sub> CuN <sub>2</sub> O <sub>5</sub> S   | C <sub>19</sub> H <sub>18</sub> CuN <sub>2</sub> O <sub>7</sub> S | C <sub>13</sub> H <sub>8</sub> CuN <sub>2</sub> O <sub>4</sub> S | C <sub>17</sub> H <sub>18</sub> ZnN <sub>2</sub> O <sub>5</sub> S  |
| <i>Mr</i>                      | 457.93                                                              | 481.95                                                            | 351.81                                                           | 459.76                                                             |
| Temperature                    | 293 K                                                               | 293 K                                                             | 293 K                                                            | 293 K                                                              |
| Crystal system                 | Orthorhombic                                                        | Monoclinic                                                        | Monoclinic                                                       | Orthorhombic                                                       |
| Space group                    | <i>Pbca</i>                                                         | <i>P21/n</i>                                                      | <i>P21/n</i>                                                     | <i>Pbca</i>                                                        |
| <i>a</i> (Å)                   | 16.10966 (19)                                                       | 4.9913 (2)                                                        | 6.17103(14)                                                      | 16.0233(3)                                                         |
| <i>b</i> (Å)                   | 14.61582 (19)                                                       | 26.3098 (11)                                                      | 31.0014(7)                                                       | 14.6001(2)                                                         |
| <i>c</i> (Å)                   | 16.4897 (2)                                                         | 14.5516 (6)                                                       | 6.95964(16)                                                      | 16.6104(3)                                                         |
| $\alpha$ (deg)                 | 90                                                                  | 90                                                                | 90                                                               | 90                                                                 |
| $\beta$ (deg)                  | 90                                                                  | 95.274 (4)                                                        | 93.726(2)                                                        | 90                                                                 |
| $\gamma$ (deg)                 | 90                                                                  | 90                                                                | 90                                                               | 90                                                                 |
| <i>V</i> (Å <sup>3</sup> )     | 3882.59(8)                                                          | 1902.83(14)                                                       | 1328.64(5)                                                       | 3885.86(11)                                                        |
| <i>Z</i>                       | 8                                                                   | 4                                                                 | 4                                                                | 8                                                                  |
| <i>D</i> (Mg·m <sup>-3</sup> ) | 1.567                                                               | 1.682                                                             | 1.759                                                            | 1.572                                                              |
| <i>F</i> (000)                 | 1880.0                                                              | 988.0                                                             | 708.0                                                            | 1888.0                                                             |
| $\theta$ range                 | 4.918 to 78.40°                                                     | 3.36 to 79.26°                                                    | 2.85 to 79.12°                                                   | 4.89 to 79.16°                                                     |
| Limiting indices               | -20 ≤ <i>h</i> ≤ 20,<br>-18 ≤ <i>k</i> ≤ 15,<br>-17 ≤ <i>l</i> ≤ 20 | -6 ≤ <i>h</i> ≤ 6,<br>-33 ≤ <i>k</i> ≤ 29,<br>-16 ≤ <i>l</i> ≤ 18 | -7 ≤ <i>h</i> ≤ 7,<br>-38 ≤ <i>k</i> ≤ 37,<br>-8 ≤ <i>l</i> ≤ 8  | -20 ≤ <i>h</i> ≤ 16,<br>-9 ≤ <i>k</i> ≤ 18,<br>-21 ≤ <i>l</i> ≤ 18 |
| CCDC No.                       | 2130947                                                             | 2131195                                                           | 2130946                                                          | 2131194                                                            |

Selected Bond Distances (Å) and Angles (°) for **1-4**.

**1**

|                 |            |                 |            |
|-----------------|------------|-----------------|------------|
| Cu(1)-O(3)      | 1.941(3)   | Cu(1)-N(2)      | 2.006(4)   |
| Cu(1)-O(1)      | 1.954(4)   | Cu(1)-O(5)      | 2.153(4)   |
| Cu(1)-N(1)      | 1.995(4)   |                 |            |
| O(3)-Cu(1)-O(1) | 90.26(15)  | N(1)-Cu(1)-N(2) | 80.64(17)  |
| O(3)-Cu(1)-N(1) | 167.34(17) | O(3)-Cu(1)-O(5) | 97.92(16)  |
| O(1)-Cu(1)-N(1) | 92.70(16)  | O(1)-Cu(1)-O(5) | 97.83(17)  |
| O(3)-Cu(1)-N(2) | 92.25(17)  | N(1)-Cu(1)-O(5) | 93.86(17)  |
| O(1)-Cu(1)-N(2) | 158.88(18) | N(2)-Cu(1)-O(5) | 102.57(18) |

**2**

|                 |            |                   |            |
|-----------------|------------|-------------------|------------|
| Cu(1)-O(3)      | 1.915(3)   | Cu(1)-N(1)        | 2.001(4)   |
| Cu(1)-O(1)      | 1.934(3)   | Cu(1)-N(2)        | 2.020(4)   |
| Cu(1)-O(2)#2    | 2.316(3)   |                   |            |
| O(3)-Cu(1)-O(1) | 92.68(13)  | N(1)-Cu(1)-N(2)   | 82.06(15)  |
| O(3)-Cu(1)-N(1) | 169.14(15) | O(3)-Cu(1)-O(2)#2 | 92.81(14)  |
| O(1)-Cu(1)-N(1) | 91.47(14)  | O(1)-Cu(1)-O(2)#2 | 100.94(13) |
| O(3)-Cu(1)-N(2) | 91.12(14)  | N(1)-Cu(1)-O(2)#2 | 96.26(14)  |
| O(1)-Cu(1)-N(2) | 162.77(15) | N(2)-Cu(1)-O(2)#2 | 95.65(13)  |

Symmetry transformations used to generate equivalent atoms: #2 x+1, y, z

**3**

|                   |          |                  |          |
|-------------------|----------|------------------|----------|
| Cu(1)-O(1)        | 1.947(6) | Cu(1)-O(3)       | 1.992(6) |
| Cu(1)-O(21)       | 1.992(5) | Cu(1)-O(42)      | 2.003(6) |
| Cu(1)-N(1)        | 2.256(7) |                  |          |
| O(1)-Cu(1)-O(21)  | 173.1(2) | O(1)-Cu(1)-O(42) | 89.2(3)  |
| O(21)-Cu(1)-O(42) | 93.3(2)  | O(1)-Cu(1)-O(3)  | 88.7(2)  |
| O(21)-Cu(1)-O(3)  | 88.0(2)  | O(42)-Cu(1)-O(3) | 172.6(2) |
| O(1)-Cu(1)-N(1)   | 100.5(3) | O(21)-Cu(1)-N(1) | 85.9(3)  |

|                  |            |                  |            |
|------------------|------------|------------------|------------|
| O(42)-Cu(1)-N(1) | 89.7(3)    | O(3)-Cu(1)-N(1)  | 97.6(3)    |
| <b>4</b>         |            |                  |            |
| Zn(1)-O(5)       | 1.968(4)   | Zn(1)-O(4)       | 2.006(4)   |
| Zn(1)-O(2)       | 2.031(3)   | Zn(1)-N(13)      | 2.107(4)   |
| Zn(1)-N(7)       | 2.124(4)   |                  |            |
| O(5)-Zn(1)-O(4)  | 104.68(17) | O(2)-Zn(1)-N(13) | 89.67(16)  |
| O(5)-Zn(1)-O(2)  | 101.52(15) | O(5)-Zn(1)-N(7)  | 101.56(17) |
| O(4)-Zn(1)-O(2)  | 88.89(14)  | O(4)-Zn(1)-N(7)  | 90.76(15)  |
| O(5)-Zn(1)-N(13) | 110.24(18) | O(2)-Zn(1)-N(7)  | 156.22(16) |
| O(4)-Zn(1)-N(13) | 144.61(17) | N(13)-Zn(1)-N(7) | 77.03(17)  |

**Tab. S2.** Contributions (%) of main interactions to the FP plots for **1-3**.

| <b>Various<br/>interactions</b> | <b>1</b> | <b>2</b> | <b>3</b> |
|---------------------------------|----------|----------|----------|
| <b>H...H</b>                    | 39.6     | 28.0     | 15.1     |
| <b>O...H</b>                    | 29.0     | 18.7     | 15.4     |
| <b>C...H</b>                    | 16.8     | 21.5     | 21.4     |
| <b>S...H</b>                    | 5.2      | 9.1      | 6.0      |
| <b>C...C</b>                    | 3        | 2.7      | 2.4      |
| <b>S...O</b>                    | 2.5      | trace    | 0.7      |
| <b>N...H</b>                    | 1.8      | 1.5      | 15.4     |
| <b>O...O</b>                    | trace    | 2.0      | 5.1      |

**Tab. S3.** Screening of catalysts.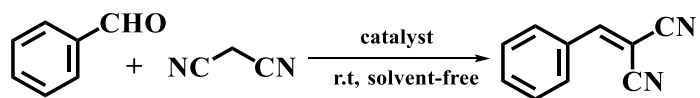

| Empirical | Catalyst                                        | Yield (%) <sup>a</sup> | Sele (%) |
|-----------|-------------------------------------------------|------------------------|----------|
| 1         | -                                               | Trace                  |          |
| 2         | Cu(Ac) <sub>2</sub> ·2H <sub>2</sub> O + bpy    | 100                    | 100      |
| 3         | Cu(Ac) <sub>2</sub> ·2H <sub>2</sub> O + phen   | 95.30                  | 100      |
| 4         | Cu(Ac) <sub>2</sub> ·2H <sub>2</sub> O + 3-CNPy | 34.18                  | 100      |
| 5         | <b>1</b>                                        | 100                    | 100      |
| 6         | <b>2</b>                                        | 95.46                  | 100      |
| 7         | <b>3</b>                                        | 35.25                  | 100      |

Reaction conditions: malononitrile (1.3 mmol), benzaldehyde (1.0 mmol), catalyst (0.5 mol%), 30 min, ultrasound (200 W).

<sup>a</sup> Yields of products were determined by GC-MS.

**Tab. S4.** Evaluation of the catalytic activity of complex **1** for Knoevenagel condensation. <sup>a</sup>

| Entry | Reactant                                                                            | Product                                                                              | Yield (%) <sup>b</sup> |
|-------|-------------------------------------------------------------------------------------|--------------------------------------------------------------------------------------|------------------------|
| 1     | 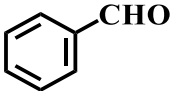   |     | 100                    |
| 2     |    |     | 95.97                  |
| 3     |    |    | 60.79                  |
| 4     |   |   | 32.50                  |
| 5     |  |   | 96.65                  |
| 6     |  |  | 100                    |
| 7     |  |   | 82.23                  |
| 8     |  |  | 84.85                  |
| 9     |  |   | 51.95                  |



|    |                                                                                     |                                                                                      |       |
|----|-------------------------------------------------------------------------------------|--------------------------------------------------------------------------------------|-------|
| 10 | 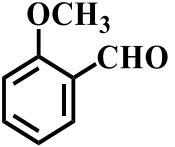   |     | 65.06 |
| 11 |    |     | 83.51 |
| 12 |    |    | 30.31 |
| 13 |    |    | 54.87 |
| 14 |   |    | 45.32 |
| 15 |  |  | trace |
| 16 |  |   | 100   |
| 17 |  |   | 80.48 |
| 18 |  |   | 92.61 |
| 19 |  |   | 85.06 |
| 20 |  |  | 100   |

|    |                                                                                   |                                                                                    |       |
|----|-----------------------------------------------------------------------------------|------------------------------------------------------------------------------------|-------|
| 21 | 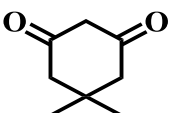 |  | 74.84 |
| 22 |  |  | 90.14 |

<sup>a</sup> Reaction conditions: entry 1-18: 1.0 mmol reactant, 1.3 mmol malononitrile; entry 19-22: 1.0 mmol reactant, 1.3 mmol benzaldehyde, r.t, 60 min, 0.5 mol% catalyst **1**.

<sup>b</sup> Catalytic reaction products were analyzed and identified by GC-MS.

**Tab. S5.** Free energy of the optimized structures of the Knoevenagel condensation reaction pathway catalyzed by complex **1**.

|                      | IS | TS1  | MS1   | MS2   | TS2 | MS3   | TS3  | MS4   | TS    |
|----------------------|----|------|-------|-------|-----|-------|------|-------|-------|
| Free energy (KJ/mol) | 0  | 43.6 | -13.2 | -56.9 | 7.6 | -53.8 | 19.4 | -53.9 | -14.7 |

**Tab. S6.** Comparison with different MOF catalysts in the cyclic addition of CO<sub>2</sub> and epoxides.

| entry | Catalyst                                         | Yield (%) | P / Mpa | T / °C | T / h | References |
|-------|--------------------------------------------------|-----------|---------|--------|-------|------------|
| 1     | <b>4</b>                                         | 100       | 0.1     | rt     | 19.5  | this work  |
| 2     | Ni-TCPE1                                         | >99       | 1       | 100    | 12    | 5          |
| 3     | [Cu <sub>4</sub> (L <sub>1</sub> )] <sub>n</sub> | 96        | 0.1     | rt     | 48    | 6          |
| 4     | FJI-H14                                          | 86        | 0.1     | 80     | 24    | 7          |
| 5     | VPI-100                                          | 96        | 1       | 90     | 6     | 8          |
| 6     | V8-1                                             | >99       | 0.5     | 70     | 16    | 9          |
| 7     | HE-ZIF-BM                                        | 97        | 1       | 100    | 10    | 10         |
| 8     | MOF@mSiO <sub>2</sub> -YS                        | 91        | 0.8     | rt     | 48    | 11         |
| 9     | CuBDC/CMC                                        | 91.5      | 0.1     | 80     | 17    | 12         |

**Tab. S7.** Cycloaddition of CO<sub>2</sub> with various epoxides.<sup>a</sup>

| Entry          | Reactant                                                                            | Product                                                                             | Yield (%) <sup>b</sup> |
|----------------|-------------------------------------------------------------------------------------|-------------------------------------------------------------------------------------|------------------------|
| 1              |    |    | 100                    |
| 2              |    |    | 95.97                  |
| 3              |    |    | 60.79                  |
| 4              |   |  | 32.50                  |
| 5 <sup>c</sup> |  |  | 96.65                  |
| 6 <sup>d</sup> |  |  | 100                    |

<sup>a</sup> Reaction conditions: substrate (2.0 mmol), CO<sub>2</sub> (1 atm), TBAB (15 mg), 0.25 mol% catalyst **4**, solvent-free, r.t, 19.5 h.

<sup>b</sup> Yields of products were determined by GC-MS. <sup>c</sup> Bu<sub>4</sub>NCl replace of TBAB. <sup>d</sup> Bu<sub>4</sub>NI replace of TBAB.

**Tab. S8.** Free energy of the optimized structures of the CO<sub>2</sub> cycloaddition reaction pathway catalyzed by complexes **1** and **4**.

**1**

---

|          | IS | TS1  | MS1   | MS2   | TS2    | MS3   | TS3  | MS4   | TS    |
|----------|----|------|-------|-------|--------|-------|------|-------|-------|
| Free     |    |      |       |       |        |       |      |       |       |
| energy   | 0  | 65.2 | -17.8 | -14.8 | -14.86 | -10.1 | 22.4 | -74.2 | -49.4 |
| (KJ/mol) |    |      |       |       |        |       |      |       |       |

---

**4**

---

|          | IS | TS1  | MS1   | MS2   | TS2    | MS3   | TS3  | MS4   | TS    |
|----------|----|------|-------|-------|--------|-------|------|-------|-------|
| Free     |    |      |       |       |        |       |      |       |       |
| energy   | 0  | 35.5 | -24.6 | -14.8 | -14.86 | -10.1 | 22.4 | -74.2 | -49.4 |
| (KJ/mol) |    |      |       |       |        |       |      |       |       |

---

**Tab. S9.** Free energy profiles for the TBAB catalyzed ring opening calculated.

|                      | IS | TS1  | MS1  |
|----------------------|----|------|------|
| Free energy (KJ/mol) | 0  | 80.9 | 11.6 |

## References

1. B. Delley, *J. Chem. Phys.*, 2000, **113**, 7756–7764.
2. J. P. Perdew, K. Burke and M. Ernzerhof, *Phys. Rev. Lett.*, 1996, **77**, 3865.
3. B. Delley, *Phys. Rev. B*, 2002, **66**, 155125.
4. D. Sheppard, R. Terrell and G. Henkelman, *J. Chem. Phys.*, 2008, **128**, 134106.
5. Z. Zhou, C. He, J. Xiu, L. Yang and C.-Y. Duan, *J. Am. Chem. Soc.*, 2015, **137**, 15066–15069.
6. P.-Z. Li, X.-J. Wang, J. Liu, J.-S. Lim, R.-Q. Zou and Y.-L. Zhao, *J. Am. Chem. Soc.*, 2016 **138**, 2142–2145.
7. L.-F. Liang, C.-P. Liu, F.-L. Jiang, Q.-H. Chen, L.-J. Zhang, H. Xue, H.-L. Jiang, J.-J. Qian, D.-Q. Yuan and M.-C. Hong, *Nat. Commun.*, 2017, **8**, 1–10.
8. J. Zhu, P. M. Usov, W.-Q. Xu, P. J. Celis-Salazar, S.-Y. Lin, M. C. Kessinger, C. Landaverde-Alvarado, M. Cai, A. M. May, C. Slebodnick, D.-R. Zhu, S. D. Senanayake and A. J. Morris, *J. Am. Chem. Soc.*, 2018, **140**, 993–1003.
9. J.-P. Cao, Y.-S. Xue, N.-F. Li, J.-J. Gong, R.-K. Kang and Y. Xu, *J. Am. Chem. Soc.*, 2019, **141**, 19487–19497.
10. W. Xu, H. Chen, K.-C. Jie, Z.-Z. Yang, T.-T. Li and S. Dai, *Angew. Chem.*, 2019, **131**, 5072–5076.
11. S.-X. Bao, J.-Y. Li, B.-Y. Guan, M.-J. Jia, O. Terasaki and J.-H. Yu, *Matter*, 2020, **3**, 498–508.
12. X.-Y. Bai, X.-Y. Lu, R. Ju, H. Chen, L. Shao, X. Zhai, Y.-N. Li, F.-Q. Fan, Y. Fu



and W. Qi, *Angew. Chem., Int. Ed.*, 2021, **60**, 701–705.
